# Supplementary material
Source: publisher site journal article supplement (https://www.kjim.org/upload/media/kjim-2023-350-Supplementary-Table-1.pdf)
Supplement: Supplementary file 1 [file kjim-2023-350-Supplementary-Table-1.pdf]

**Supplementary Table1. Comparison of disease activity between treatment groups according to underlying disease (per protocol analysis)**

| Variable                            | Total               | Continuous-KRG      | Placebo-KRG         | <i>p</i> value |
|-------------------------------------|---------------------|---------------------|---------------------|----------------|
| SjS patients (n = 77) <sup>a)</sup> |                     |                     |                     |                |
| ESSPRI, 0W                          | 60.0 (50.0 to 67.0) | 60.0 (50.0 to 67.0) | 60.0 (52.2 to 67.0) | 0.842          |
| ESSPRI, 12W                         | 50.0 (38.5 to 58.5) | 47.0 (37.0 to 60.0) | 50.0 (40.8 to 53.0) | 0.853          |
| ΔESSPRI (12W)                       | 10.0 (0.0 to 20.0)  | 7.0 (-3.0 to 20.0)  | 10.0 (0.8 to 19.2)  | 0.782          |
| ESSPRI, 24W                         | 47.0 (33.0 to 57.0) | 47.0 (37.0 to 60.0) | 45.0 (33.0 to 56.0) | 0.477          |
| ΔESSPRI (24W)                       | 13.0 (1.5 to 23.5)  | 10.0 (0.0 to 23.0)  | 14.0 (6.2 to 24.0)  | 0.365          |
| RA patients (n = 43) <sup>a)</sup>  |                     |                     |                     |                |
| DAS28-ESR, 0W                       | 3.4 (2.6 to 4.1)    | 3.4 (2.7 to 4.5)    | 3.3 (2.3 to 4.0)    | 0.361          |
| DAS28-ESR, 12W                      | 3.4 (2.5 to 3.9)    | 3.5 (3.1 to 4.0)    | 3.1 (2.3 to 3.5)    | 0.033          |
| ΔDAS28-ESR (12W)                    | 0.1 (-0.5 to 0.8)   | 0.0 (-0.7 to 0.8)   | 0.1 (-0.4 to 0.6)   | 0.356          |
| DAS28-ESR, 24W                      | 3.3 (2.4 to 4.0)    | 3.5 (2.6 to 4.0)    | 3.0 (2.0 to 4.0)    | 0.172          |
| ΔDAS28-ESR (24W)                    | 0.3 (-0.5 to 0.8)   | 0.5 (-0.7 to 0.9)   | 0.2 (-0.3 to 0.8)   | 0.925          |

Values were presented as median (interquartile range).

KRG, Korean Red Ginseng; SjS, Sjogren's syndrome; ESSPRI, EULAR Sjogren's Syndrome Patient Reported Index; RA, rheumatoid arthritis; DAS28-ESR, Disease Activity Score of 28 joints-erythrocyte sedimentation rate.

<sup>a)</sup>ESSPRI was measured for patients with Sjogren's syndrome and both diseases, and DAS28-ESR for RA patients.
